# Supplementary material for: Enhancing particle number concentration modelling accuracy in China by incorporating various nucleation parameterization schemes into the CMAQ version 5.3.2 model
Source: Copernicus journal article supplement (doi:10.5194/egusphere-2025-2992), 2025-07-24
Supplement: Supplementary file 1 [file egusphere-2025-2992-supplement.pdf]

## Supplementary Material for

# Enhancing particle number concentration modelling accuracy in China by incorporating various nucleation parameterization schemes into the CMAQ version 5.3.2 model

Jianjiong Mao<sup>1,2</sup>, Lei Jiang<sup>1</sup>, Zhicheng Feng<sup>1</sup>, Jingyi Li<sup>1</sup>, Yanhong Zhu<sup>1</sup>, Momei Qin<sup>1</sup>, Song Guo<sup>2,3</sup>, Min Hu<sup>2,3</sup>, Jianlin Hu<sup>1,3</sup>

<sup>1</sup> Jiangsu Key Laboratory of Atmospheric Environment Monitoring and Pollution Control, School of Environmental Science and Engineering, Nanjing University of Information Science & Technology, Nanjing 210044, China

<sup>2</sup> State Key Laboratory of Regional Environment and Sustainability, International Joint Laboratory for Regional Pollution Control, Ministry of Education (IJRC), College of Environmental Sciences and Engineering, Peking University, Beijing 100871, China

<sup>3</sup> Collaborative Innovation Center of Atmospheric Environment and Equipment Technology, Nanjing University of Information Science & Technology, Nanjing 210044, China

*Correspondence to:* Jianlin Hu (jianlinhu@nuist.edu.cn)

**Table S1. The range of values for each independent variable in the TIMN nucleation rate lookup table.**

| Variables                                      | Range                           | Number of points | Values at each point                                                                                                         |
|------------------------------------------------|---------------------------------|------------------|------------------------------------------------------------------------------------------------------------------------------|
| $[\text{H}_2\text{SO}_4]$ ( $\text{cm}^{-3}$ ) | $5 \times 10^5 - 5 \times 10^9$ | 32               | $[\text{H}_2\text{SO}_4](i) = 5 \times 10^5 \times 10^{(i-1)/10}, i=1, 31;$<br>$[\text{H}_2\text{SO}_4](32) = 5 \times 10^9$ |
| T (K)                                          | 190 - 304                       | 39               | $T(j) = 190 + 3 \times (j-1), j = 1, 39$                                                                                     |
| RH (%)                                         | 0.5 - 99.5                      | 26               | $\text{RH}(1) = 0.5, \text{RH}(k) = 4 \times (k-1),$<br>$k = 2, 25; \text{RH}(26) = 99.5$                                    |
| $S$ ( $\mu\text{m}^2\text{cm}^{-3}$ )          | 20 - 200                        | 2                | $S(1) = 20, S(2) = 200$                                                                                                      |
| $[\text{NH}_3]$ ( $\text{cm}^{-3}$ )           | $10^5 - 10^{12}$                | 33               | $[\text{NH}_3](1) = 10^5;$<br>$[\text{NH}_3](m) = 10^8 \times 10^{(m-1)/10}, m=2, 32;$<br>$[\text{NH}_3](33) = 10^{12}$      |
| $Q$ ( $\text{ions cm}^{-3} \text{s}^{-1}$ )    | 2 - 100                         | 8                | $Q(n) = 2 \times 1.5^{(n-1)},$<br>$n = 1, 7; Q(8) = 100$                                                                     |

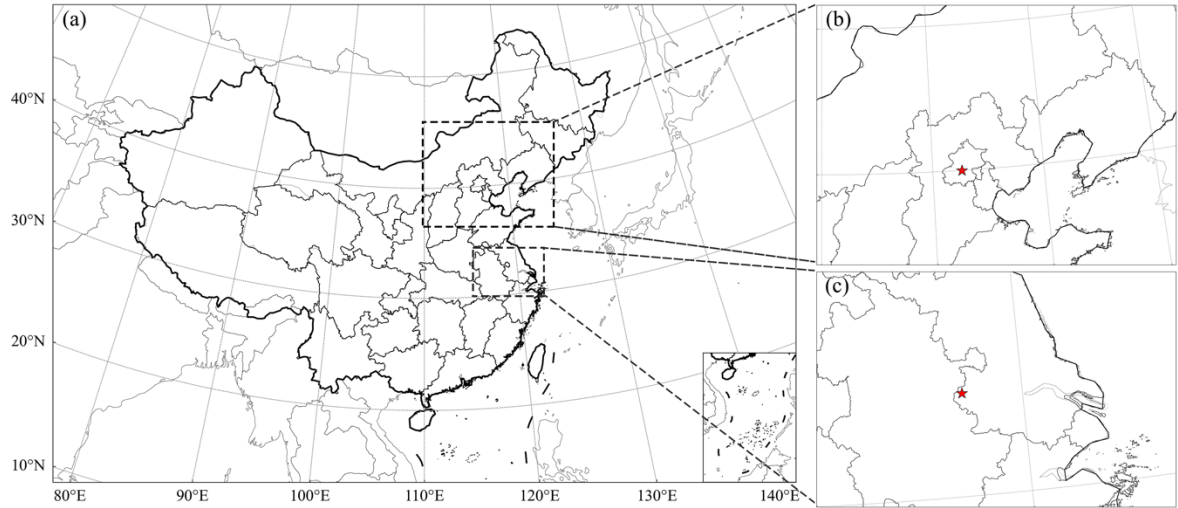

**Figure S1. (a) WRF/CMAQ modeling domain. (b) Beijing observation station. (c) Nanjing observation station.**

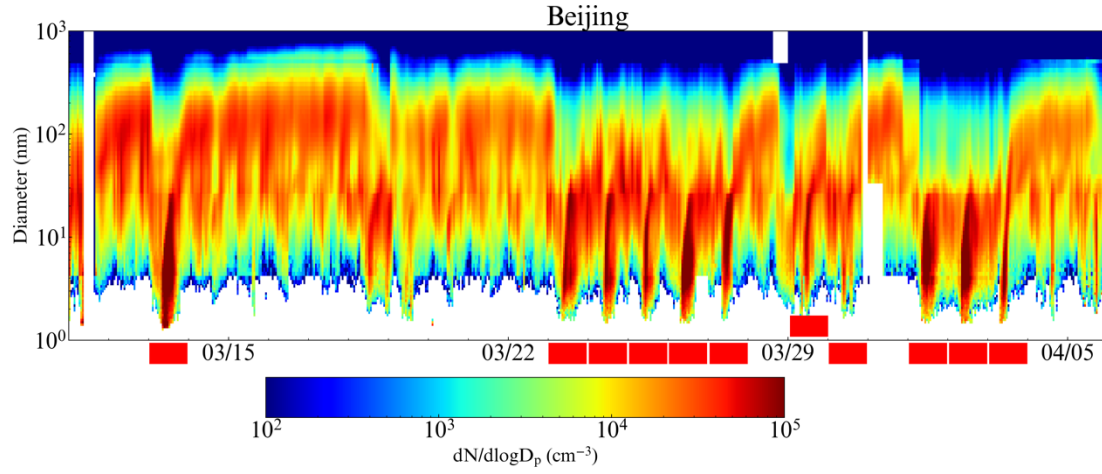

35 **Figure S2.** The observation of aerosol size distribution in 2016 in Beijing. Red rectangles are NPF days.

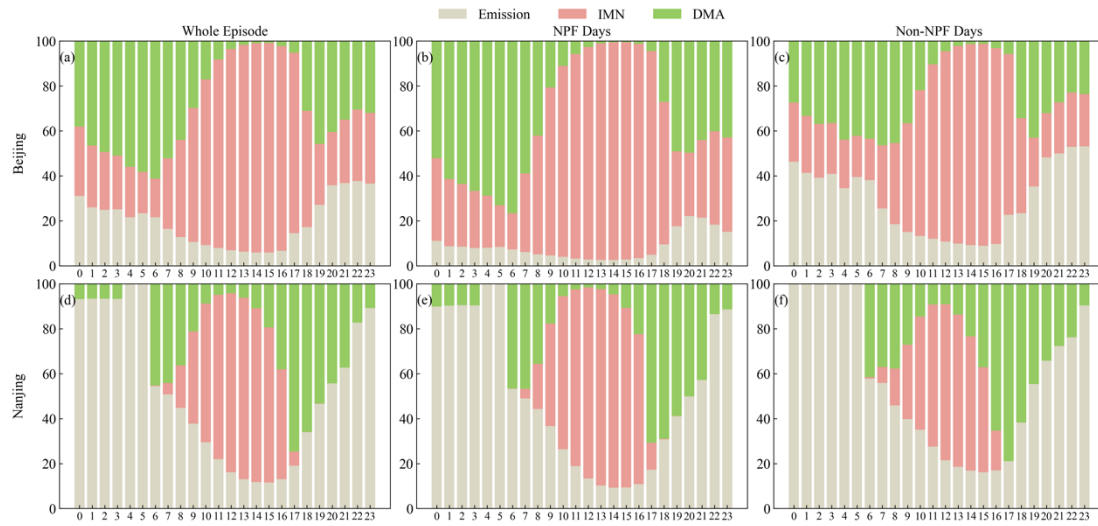

**Figure S3.** The average diel variation of the hourly contributions (%) in whole episodes, NPF days and non-NPF days.
